# Supplementary material for: A Common Origin for B-1a and B-2 Lymphocytes in Clonal Pre- Hematopoietic Stem Cells
Source: PubMed Central journal article supplement — Stem Cell Reports. 2017 May 4;8(6):1563–72. doi: 10.1016/j.stemcr.2017.04.007 (PMC5469918; doi:10.1016/j.stemcr.2017.04.007), 2017-05-04
Supplement: mmc1.pdf [file mmc1.pdf]

**Stem Cell Reports, Volume 8**

**Supplemental Information**

**A Common Origin for B-1a and B-2 Lymphocytes in Clonal**

**Pre- Hematopoietic Stem Cells**

**Brandon K. Hadland, Barbara Varnum-Finney, Pankaj K. Mandal, Derrick J. Rossi, Michael G. Poulos, Jason M. Butler, Shahin Rafii, Mervin C. Yoder, Momoko Yoshimoto, and Irwin D. Bernstein**

SUPPLEMENTAL FIGURES

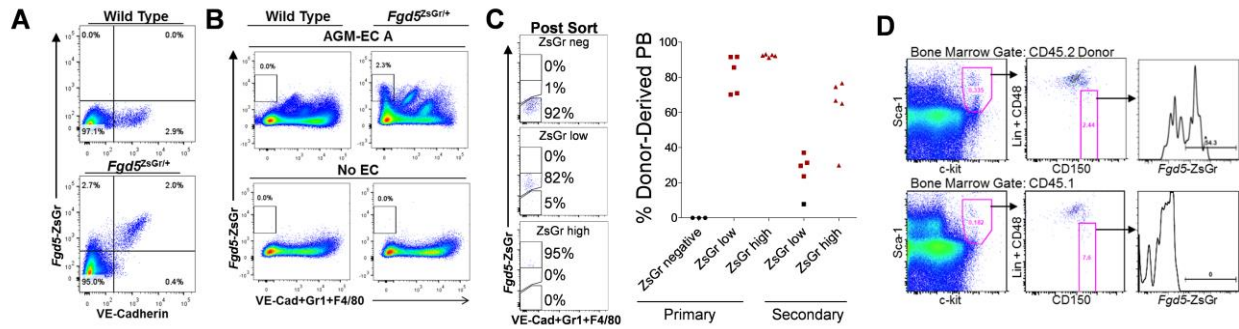

**Figure S1. *Fgd5-ZsGr* expression tracks HSC potential following AGM-EC co-culture of VE-Cadherin<sup>+</sup>CD45<sup>+/-</sup> pre-HSC isolated from E11.5 *Fgd5*<sup>ZsGr/+</sup> embryo AGM, Related to Figures 1 and 2.** A) Co-expression of *Fgd5-ZsGr* and VE-Cadherin in cells from dissected AGM regions of E11.5 *Fgd5*<sup>ZsGr/+</sup> embryos and wild type littermates. B) Expression of *Fgd5-ZsGr* in cells following 5 day culture of VE-Cadherin<sup>+</sup>CD45<sup>+/-</sup> pre-HSC from AGM regions of E11.5 *Fgd5*<sup>ZsGr/+</sup> embryos and wild type littermates with either AGM-EC or in the absence of EC stroma. Cells expressing VE-Cadherin, Gr1, or F4/80 are gated out to exclude autofluorescent myeloid and endothelial cells. C) Donor-derived peripheral blood engraftment in primary mice (at 24 weeks) and secondary mice (at 16 weeks) transplanted with cells sorted following 5 day culture of VE-Cadherin<sup>+</sup>CD45<sup>+/-</sup> pre-HSC from AGM regions of E11.5 *Fgd5*<sup>ZsGr/+</sup> embryos, based on expression of *Fgd5-ZsGr* expression (negative, low and high *Fgd5-ZsGr* expression, after gating out cells expressing VE-Cadherin, Gr1, or F4/80). D) Bone marrow engraftment from progeny of single cell (Figure 1B-C), demonstrating *Fgd5-ZsGr* expression in donor-derived (CD45.2) Lineage<sup>-</sup>Sca1<sup>+</sup>c-kit<sup>+</sup>CD150<sup>+</sup>CD48<sup>-</sup> phenotypic HSC.

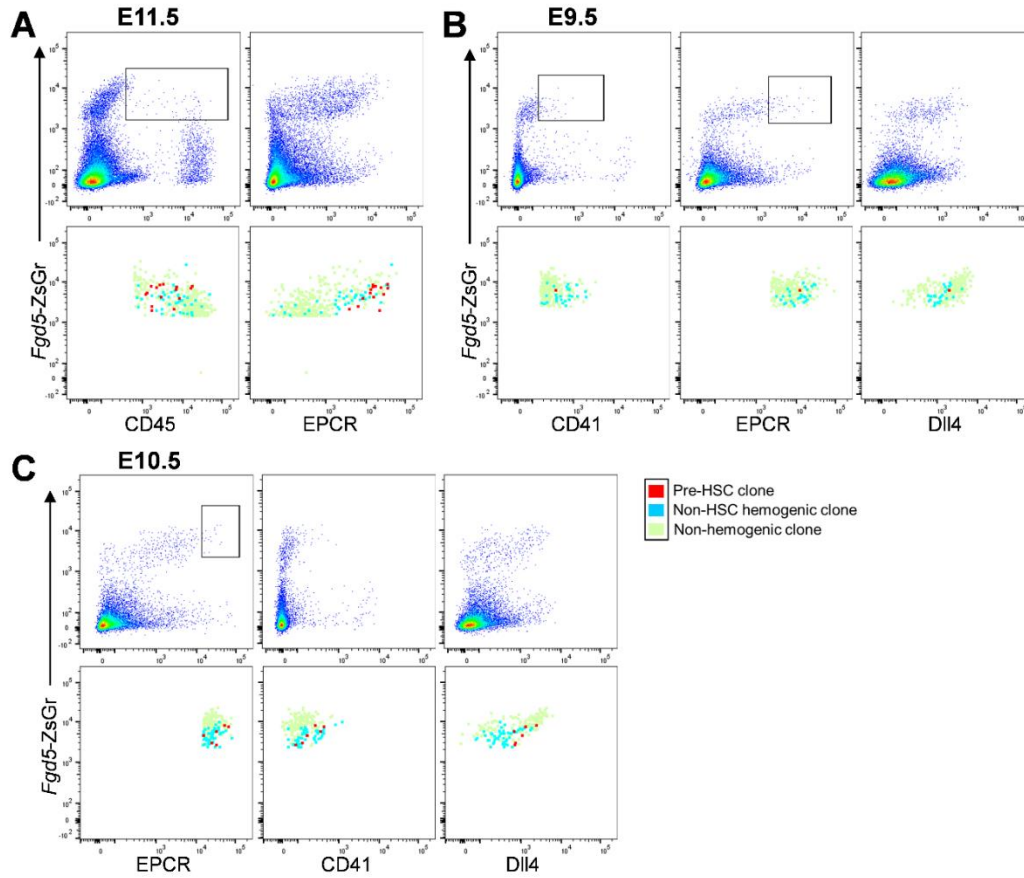

**Figure S2. Index sorting parameters of functionally distinct hemogenic precursors, Related to Figure 3.** Representative FACS analysis of the entire P-Sp/AGM population (top panels, boxes indicate windows used for sorting) and corresponding index sorting analysis (bottom panels), identifying each single cell with HSC potential (pre-HSC clone), hematopoietic colony formation without HSC potential (non-HSC hemogenic clone), or no hematopoietic colony formation (non-hemogenic clone) based on functional potential following AGM-EC co-culture. A) E11.5 AGM (corresponds to Figure 3A), B) E9.5 P-Sp (corresponds to Figure 3B, left panel), and C) E10.5 AGM (corresponds to Figure 3B, right panel).

**Table S1. B cell engraftment from E9.5 and E11.5 pre-HSC clones, Related to Figures 1 and 2**

| <b>Stage</b> | <b># of Clones Analyzed</b> | <b>% Donor PB Engraftment</b><br>Mean±SEM (range) | <b>% Donor Peritoneal Engraftment</b><br>Mean±SEM (range) | <b># of Clones with B-1a Engraftment</b> | <b># of Clones with B-2 Engraftment</b> | <b>%B-1a Cells in Peritoneum<sup>a</sup></b> | <b>%B-2 Cells in Peritoneum<sup>a</sup></b> |
|--------------|-----------------------------|---------------------------------------------------|-----------------------------------------------------------|------------------------------------------|-----------------------------------------|----------------------------------------------|---------------------------------------------|
| E9.5         | 6                           | 40±15 (8.9-88)                                    | 55±10 (31-86)                                             | 6                                        | 6                                       | 28±8                                         | 42±8                                        |
| E11.5        | 27                          | 76±0.8 (10-91)                                    | 80±1.1 (18-92)                                            | 27                                       | 27                                      | *7.5±0.9                                     | *71±2                                       |

<sup>a</sup>%B-1a and B-2 calculated as percent of total donor-derived IgM positive B cells detected in peritoneal washes. Shown is mean ± SEM; \*p<0.001, E9.5 vs E11.5 (unpaired student t-test). Data for E9.5 is pooled from 4 independent experiments and for E11.5 from 2 independent experiments.

**Table S2. List of Antibodies**

| <b>Antigen</b> | <b>Clone</b> | <b>Fluorochrome(s)</b> | <b>Source</b>  | <b>Catalog No.</b> |
|----------------|--------------|------------------------|----------------|--------------------|
| CD45           | 30-F11       | FITC, APC              | eBioscience    | 11-0451            |
| CD41           | eBioMWReg30  | PE, APC, APC-eFluor780 | eBioscience    | 12-0411            |
| VE-Cadherin    | 11D4.1       | AlexaFluor647, PE      | BD Biosciences | 562242             |
| VE-Cadherin    | eBioBV13     | PE/Cy7                 | eBioscience    | 25-1441            |
| c-kit          | 2B8          | APC                    | BD Biosciences | 553356             |
| Sca-1          | D7           | APC, PE/Cy7            | eBioscience    | 17-5981            |
| F4/80          | BM8          | APC-eFluor780, PE      | eBioscience    | 47-4801            |
| Gr-1/Ly6-G     | RB6-8C5      | APC-eFluor780, PerCP   | eBioscience    | 47-5931            |
| CD19           | ID3          | APC, PE                | BD Biosciences | 550992             |
| B220/CD45R     | RA3-6B2      | PerCP                  | BD Biosciences | 561086             |
| TER-119        | TER-119      | PE                     | eBioscience    | 12-5921            |
| CD3            | 17A2         | FITC, PE               | BD Biosciences | 555274             |
| CD4            | RM4-5        | PE                     | BD Biosciences | 553049             |
| CD8            | 53-6.7       | PerCP                  | BD Biosciences | 553036             |
| CD150          | TC15-12F12.2 | PerCP/Cy5.5            | BioLegend      | 115922             |
| CD48           | HM48-1       | PE/Cy7, PE             | BioLegend      | 103424             |
| Delta-like-4   | HMD4-1       | APC                    | Biolegend      | 130814             |
| EPCR/CD201     | eBio1560     | PE, PerCP-eFluor710    | eBioscience    | 12-2012            |
| CD45.1/Ly5.1   | A20          | PE/Cy7, eFluor450      | eBiosciences   | 25-0453            |
| CD45.2/Ly5.2   | 104          | APC-eFluor780, PE/Cy7  | eBiosciences   | 47-0454            |
| CD11b/Mac1     | M1/70        | FITC, APC-eFluor780    | eBiosciences   | 11-0112            |
| IgM            | R6-60.2      | PerCP-Cy5.5            | BD Biosciences | 562034             |
| CD23           | B3B4         | APC                    | Invitrogen     | MCD2305            |
| CD5            | 53-7.3       | PE                     | BD Biosciences | 553023             |
| AA4.1          | AA4.1        | FITC                   | eBiosciences   | 11-5892            |
| CD21           | 7G6          | PE                     | BD Biosciences | 552957             |
